# Supplementary material
Source: Springer Nature journal article supplement (https://www.springermedizin.de/resource/supplementary/12888_2011_969_MOESM2_ESM.pdf/9479704)
Supplement: MOESM2 [file 9479704]

|          |      |
|----------|------|
| EMBASE   | 52   |
| MEDLINE  | 624  |
| PsycINFO | 438  |
| Cochrane | 33   |
| PubMed   | 615  |
| Total    | 1762 |

33 articles identified through references provided from the extracted articles and through related articles.

Articles excluded on basis of abstract

95 articles identified through literature search.

127 abstracts screened

62 articles excluded

- 54 studies did not study the reliability of suicide statistics
- 5 studies excluded because of language
- 2 letters
- 1 comment

65 articles obtained in full text

34 articles excluded

- 22 studies did not study the reliability of suicide statistics
- 12 were statistical analysis

31 articles included
